# Supplementary figures and images for: Thermoplastic Starch Biocomposite Films Reinforced with Nanocellulose from Agave tequilana Weber var. Azul Bagasse
Source: MDPI journal article supplement (doi:10.3390/polym15183793), 2023-09-17

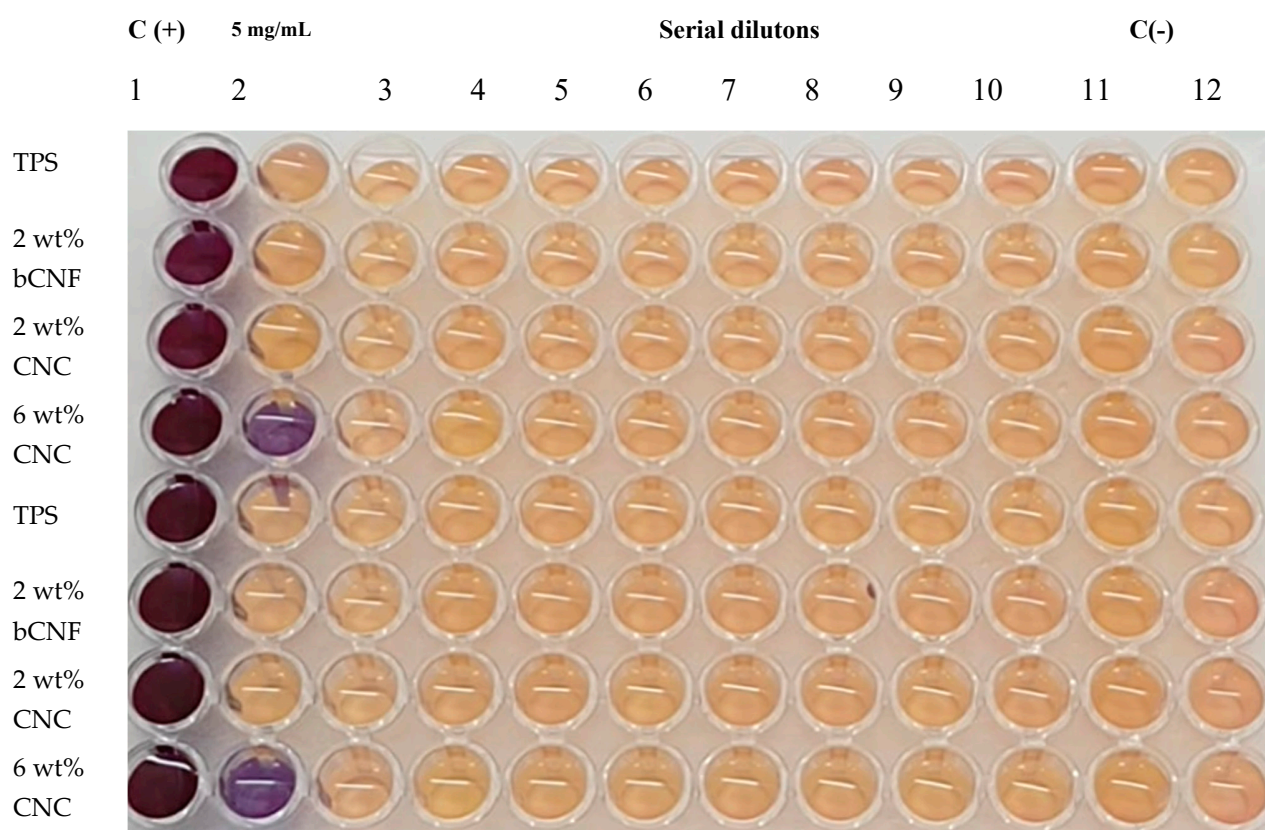

S1. 96-well plate used to determine the minimum inhibitory concentration

Supplement: s1 [file s1]
